# Supplementary material
Source: PubMed Central journal article supplement (PMC1646425)

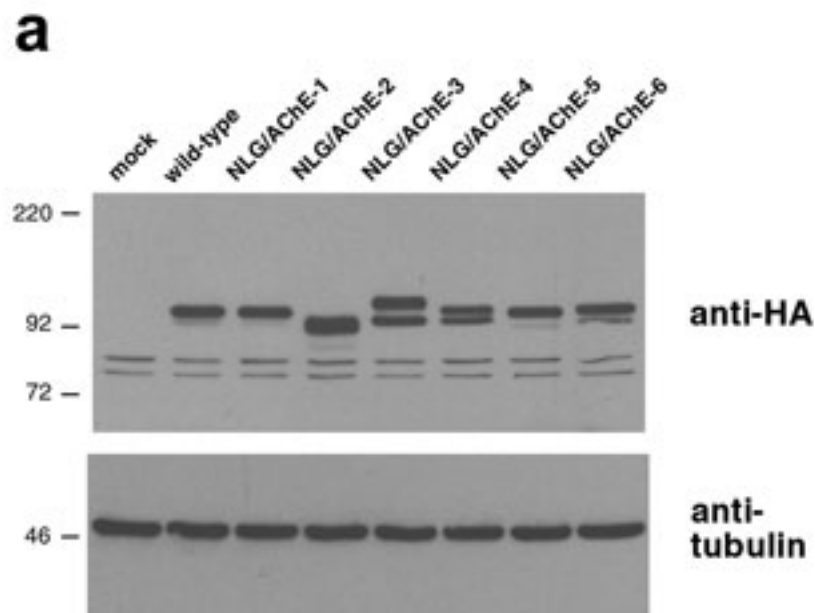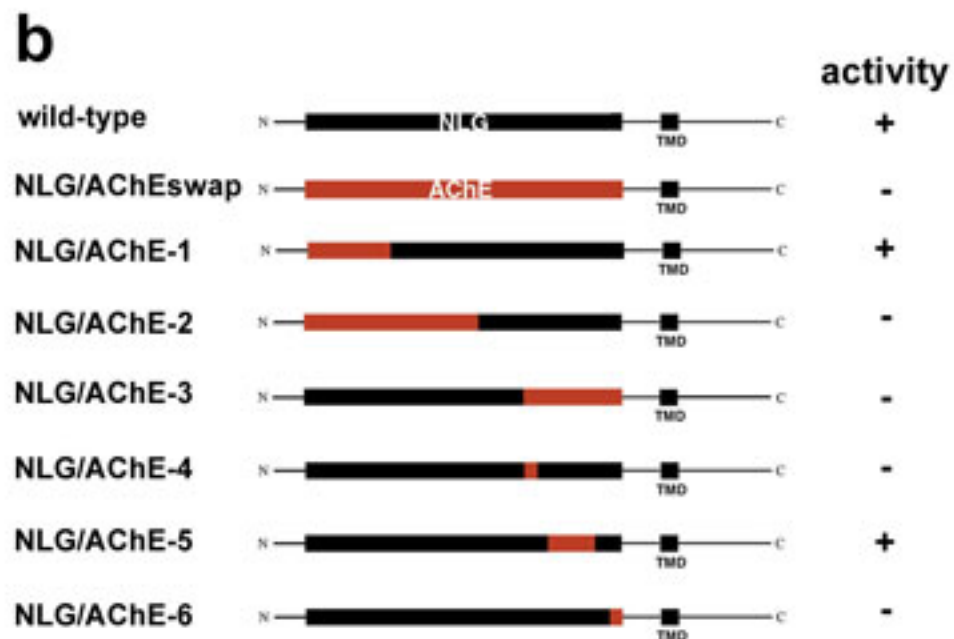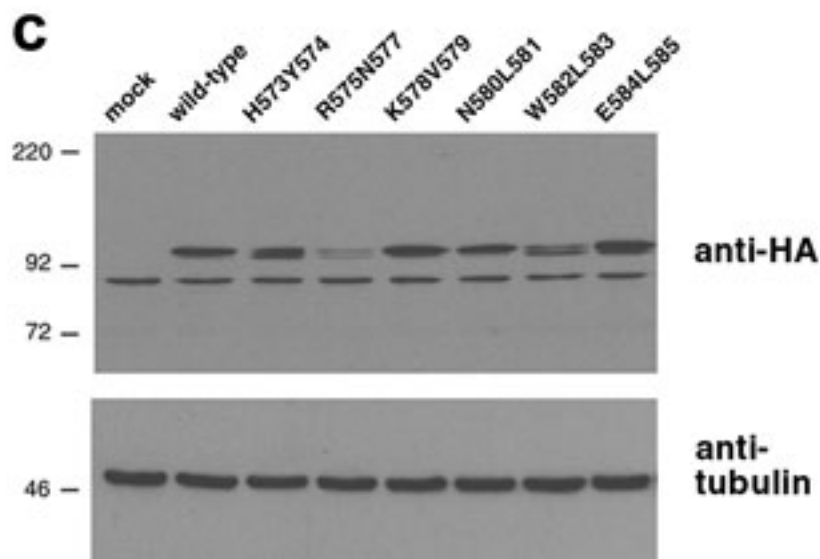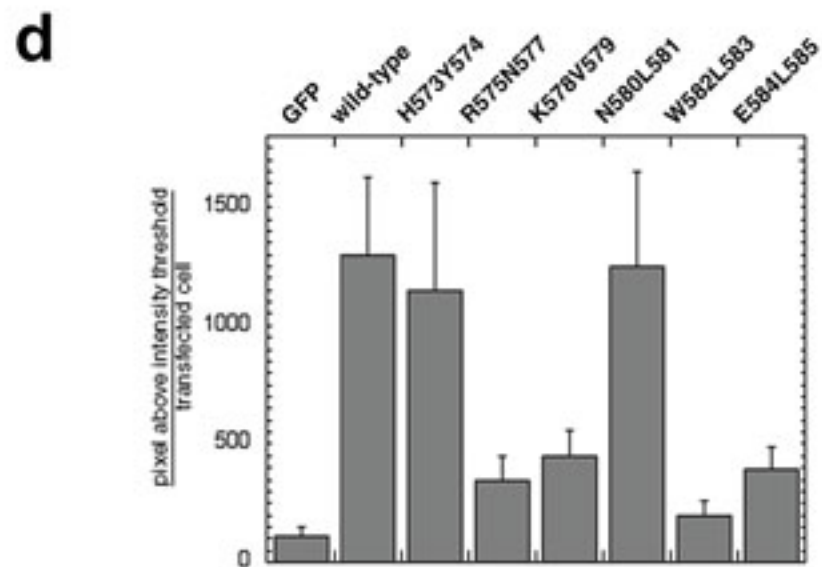

Supplement: NIHMS9042-supplement-S1.pdf [file NIHMS9042-supplement-S1.pdf]

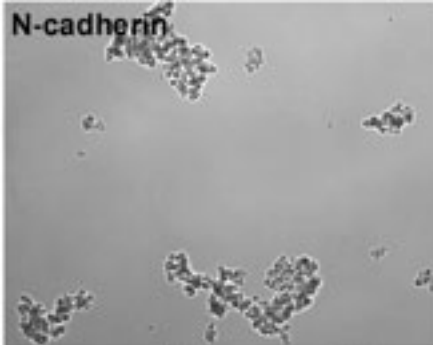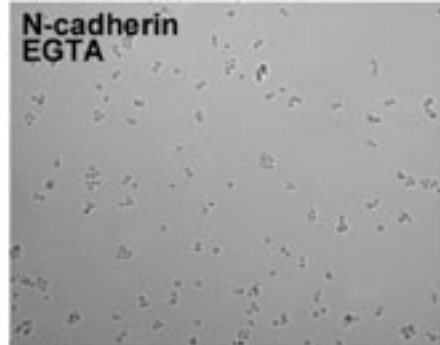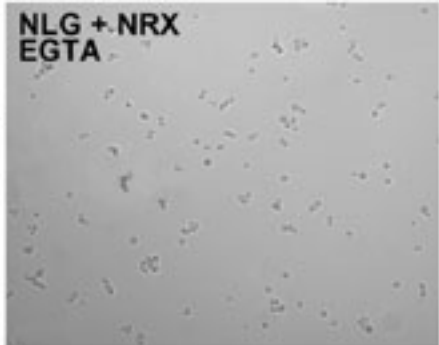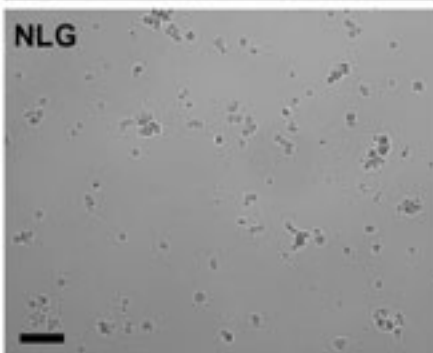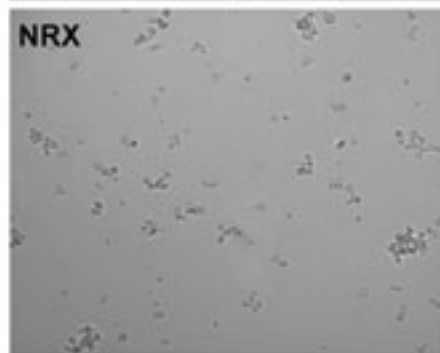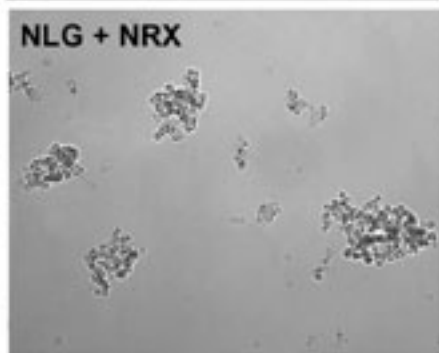

Supplement: NIHMS9042-supplement-S2.pdf [file NIHMS9042-supplement-S2.pdf]

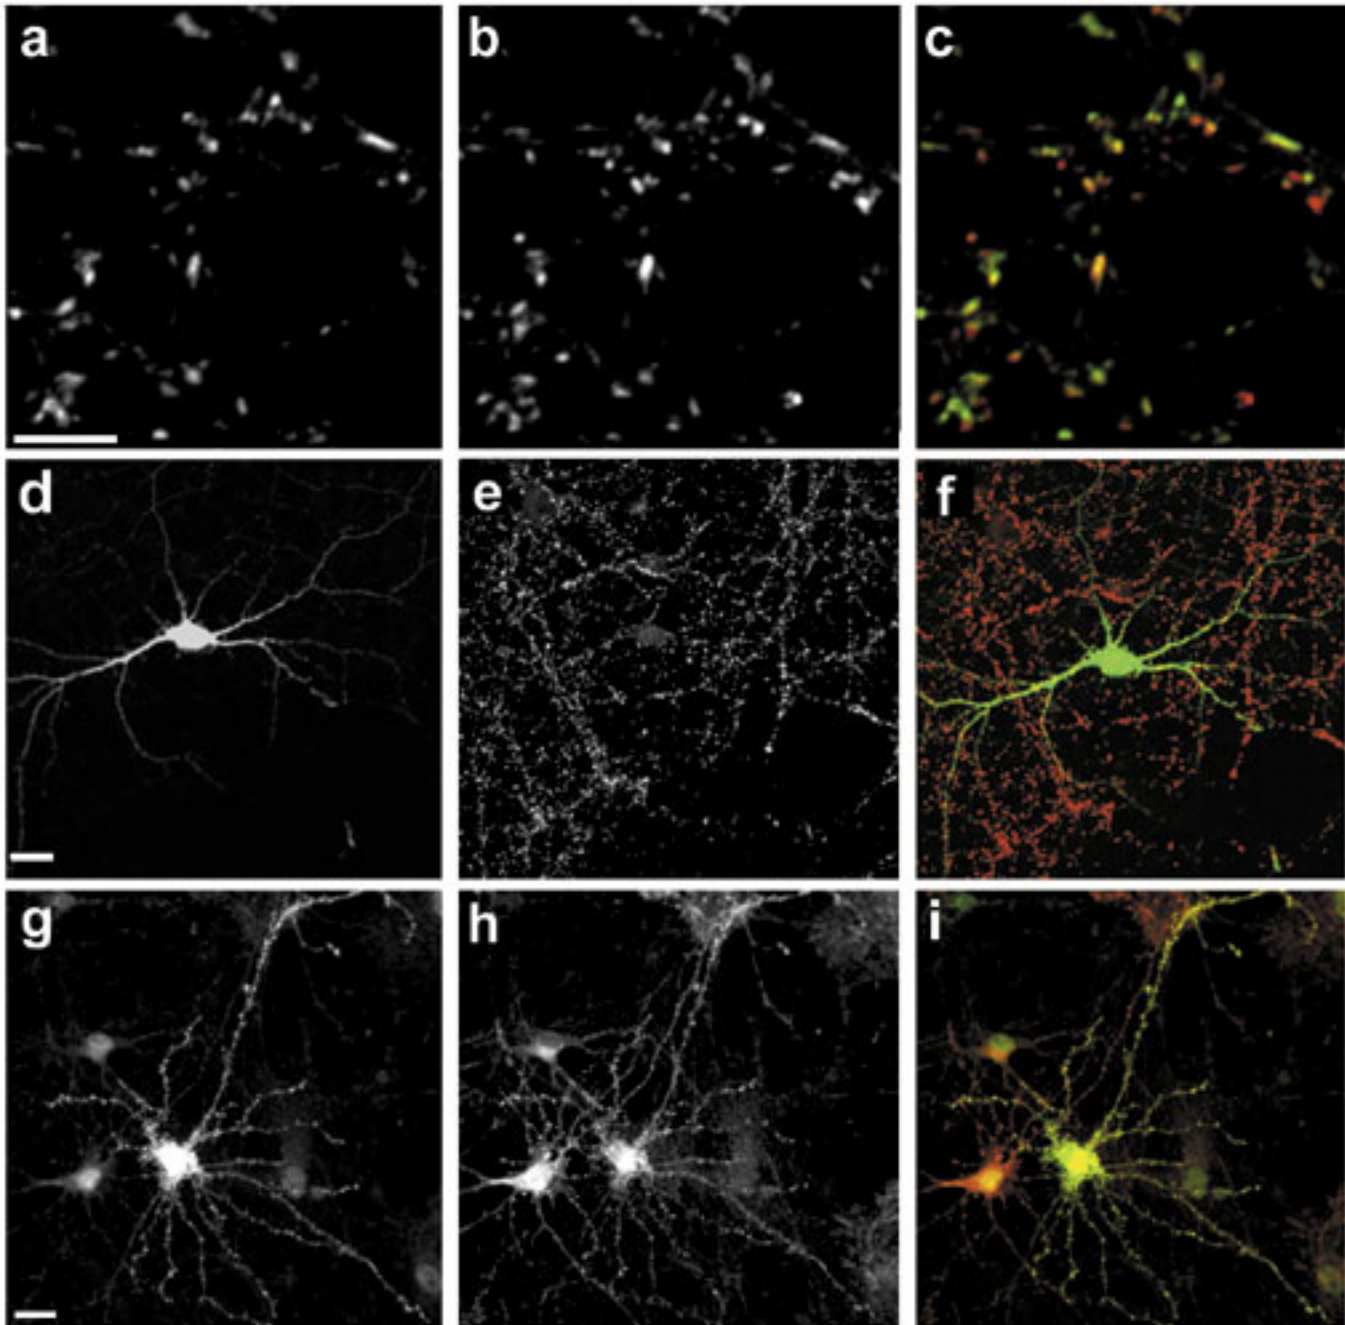

Supplement: NIHMS9042-supplement-S3.pdf [file NIHMS9042-supplement-S3.pdf]

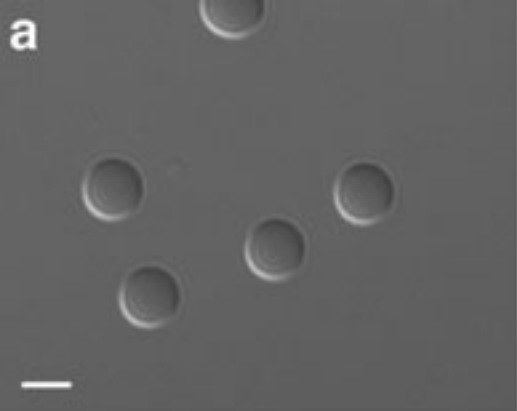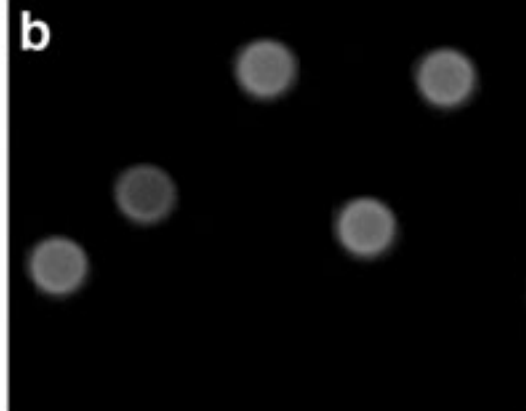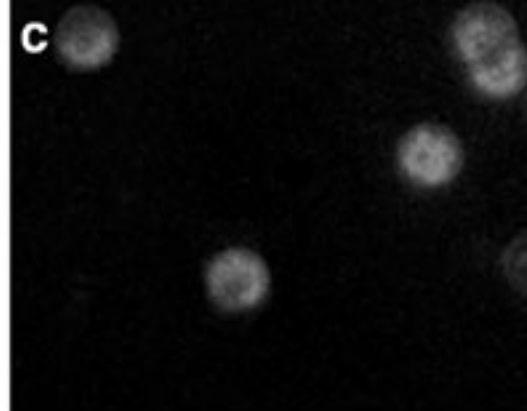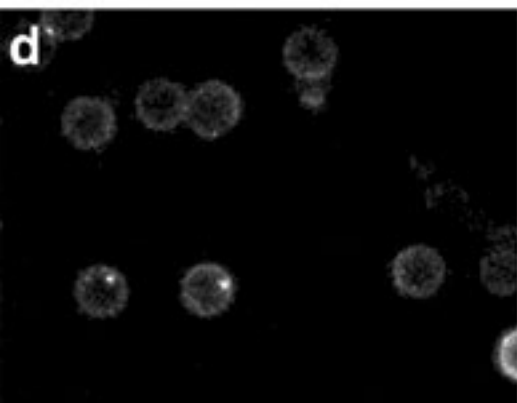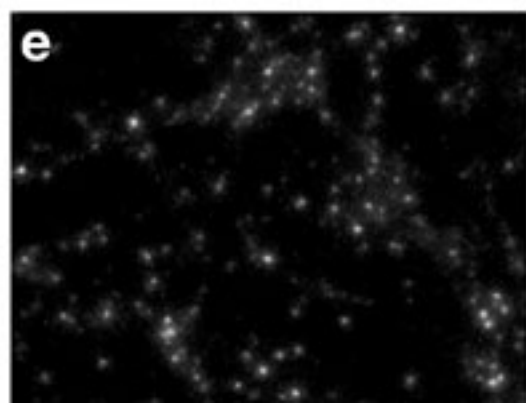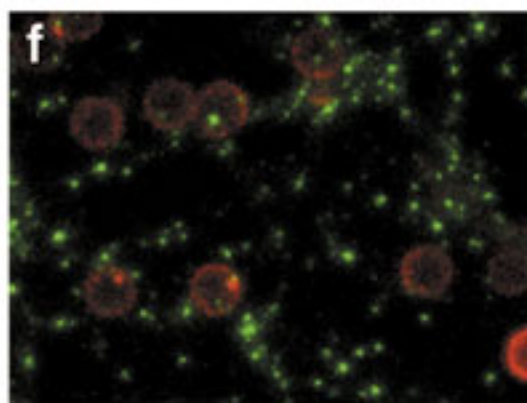

Supplement: NIHMS9042-supplement-S4.pdf [file NIHMS9042-supplement-S4.pdf]

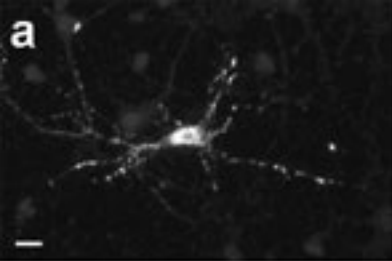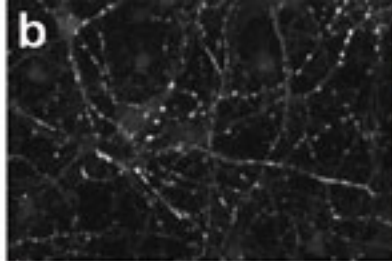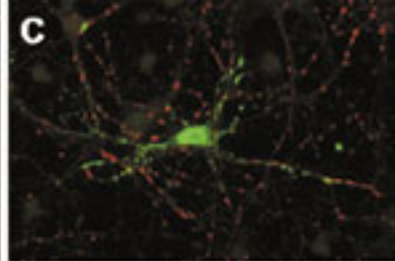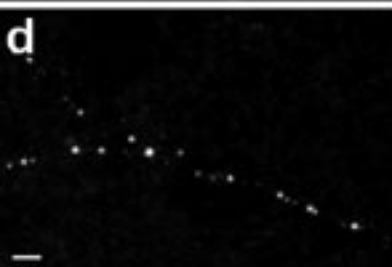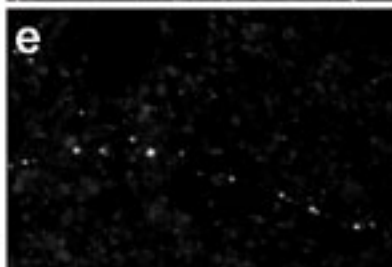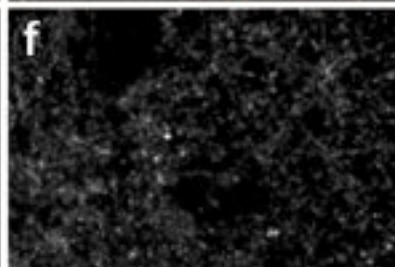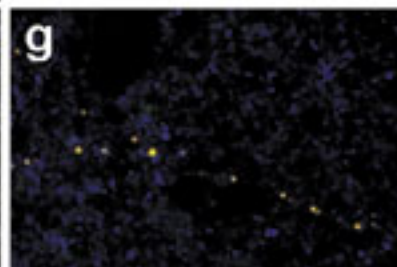

Supplement: NIHMS9042-supplement-S5.pdf [file NIHMS9042-supplement-S5.pdf]

**a**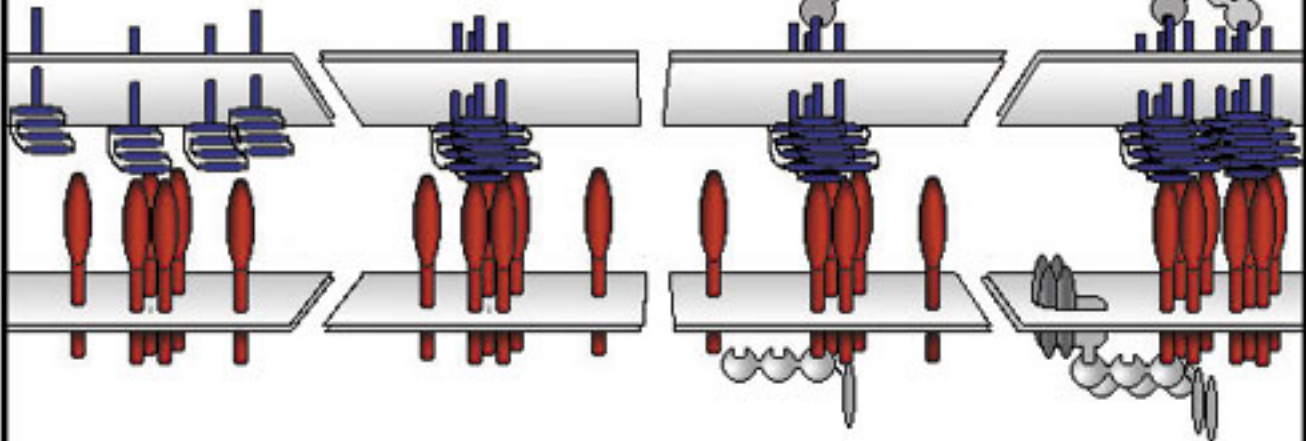**b**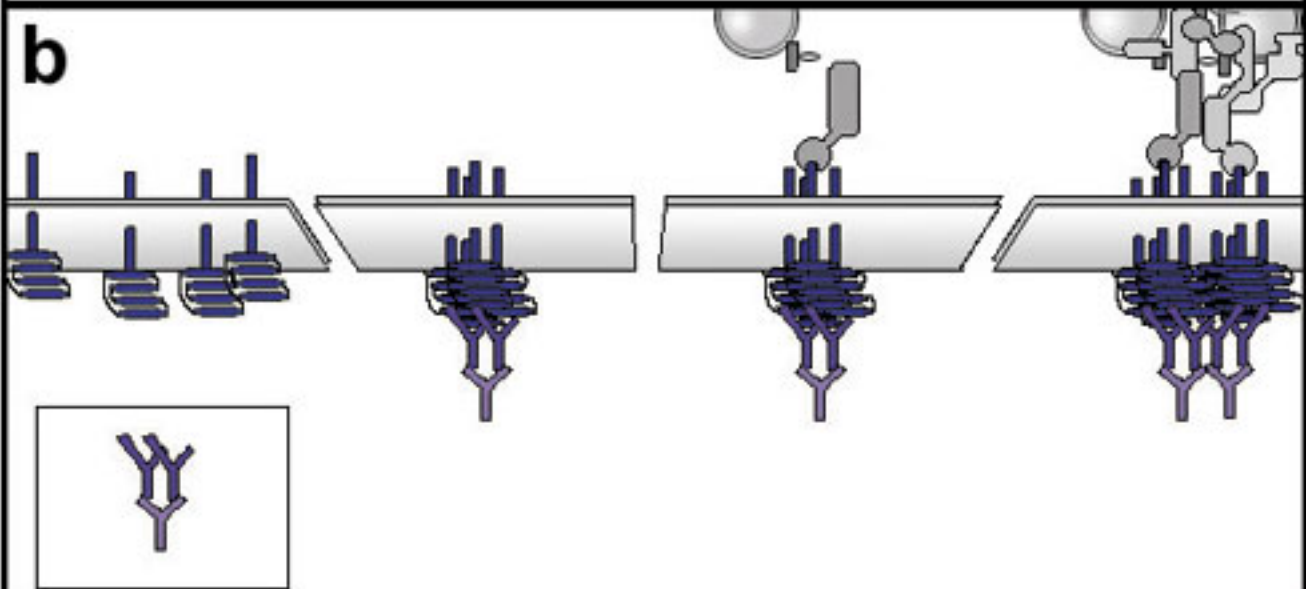

Supplement: NIHMS9042-supplement-S6.pdf [file NIHMS9042-supplement-S6.pdf]
